# Supplementary material for: Impact of COVID-19 on immunocompromised populations during the Omicron era: insights from the observational population-based INFORM study
Source: PubMed Central journal article supplement — Lancet Reg Health Eur. 2023 Oct 13;35:100747. doi: 10.1016/j.lanepe.2023.100747 (PMC10730312; doi:10.1016/j.lanepe.2023.100747), 2023-10-13
Supplement: mmc1.pdf [file mmc1.pdf]

## Supplemental materials

### Table of Contents

|                                                                                                                                                                                                                                            |                 |
|--------------------------------------------------------------------------------------------------------------------------------------------------------------------------------------------------------------------------------------------|-----------------|
| <b><i>Supplement 1. Data Sources .....</i></b>                                                                                                                                                                                             | <b><i>2</i></b> |
| <b><i>Supplement 2. Comorbidities identified in the study population .....</i></b>                                                                                                                                                         | <b><i>3</i></b> |
| <b><i>Supplement 3. Immunosuppression or immunodeficiency definitions .....</i></b>                                                                                                                                                        | <b><i>4</i></b> |
| <b><i>Supplement 4. Estimated number of COVID-19 events by immunocompromised condition, England, 2022.....</i></b>                                                                                                                         | <b><i>5</i></b> |
| <b><i>Supplement 5. The incidence rate ratio of COVID-19 hospitalisation, ICU admission and mortality in immunocompromised groups compared to the total study population. ....</i></b>                                                     | <b><i>6</i></b> |
| <b><i>Supplement 6. The incidence risk ratio of COVID-19 hospitalisation, ICU admission and mortality in fully vaccinated immunocompromised groups compared to the total study population.....</i></b>                                     | <b><i>7</i></b> |
| <b><i>Supplement 7. Total number COVID-19 hospitalisations occurring among fully vaccinated immunocompromised groups in 2022 by number of COVID-19 hospitalisations per 1000 population and total population size in England. ....</i></b> | <b><i>8</i></b> |

## Supplement 1. Data Sources

The following national datasets in England, each accessible through National Health Service (NHS) Digital, were included in this study:

- **General Practice Extraction Service Data for Pandemic Planning and Research (GDPPR):** Central collection of primary care data for COVID-19-related purposes that includes patient characteristics, diagnoses, symptoms, signs, prescriptions, referrals, immunisations, behavioural factors, and tests. GDPPR data were extracted fortnightly.
- **COVID-19 Second Generation Surveillance System (SGSS) from Pillar 1 and Pillar 2:** Includes polymerase chain reaction (PCR) testing data from Pillar 1 (i.e., swab testing for those with a clinical need and healthcare workers, if analysed by Public Health England [PHE] laboratories or NHS hospitals), and Pillar 2 (i.e., swab testing for the broader community-dwelling population) in England. Information is included for all tested individuals regardless of outcome (i.e., positive or negative), as well as the reason for PCR testing and date of symptom onset (if symptomatic). Data were provided daily to NHS Digital.
- **COVID-19 Vaccination Status Data:** A database with records of individual vaccination events across England, including details on vaccinated individuals and vaccine batch information (e.g., date of vaccine, vaccine type)
- **COVID-19 Hospitalisation in England Surveillance System (CHESS):** COVID-19 hospitalisation data, which include information on comorbidities, laboratory results, medications administered, and in-hospital use of mechanical ventilation. CHESS data are collected daily.
- **Hospital Episode Statistics (HES):** Includes more than 1 billion records of patients attending accident and emergency (A&E) units, admitted to hospital for treatment, or attending outpatient clinics at NHS hospitals across England. HES data were available from 4 datasets: HES admitted patient care (APC), HES adult critical care (ACC), HES outpatient (OP), and HES A&E. There was a change in the provision of the A&E dataset; from 2019 to 2020 onward, the Emergency Care Data Set (ECDS) was requested instead of the A&E dataset. For hospital admissions, information on reason for admission using International Classification of Diseases, 10th Revision (ICD-10) codes are available, as are corresponding dates of admission/discharge and records of all interventions or surgical procedures (Office of Population Censuses and Surveys [OPCS]-4 codes) performed in hospitals. For appointments at outpatient clinics in NHS hospitals, information available includes, among other items, type of specialist visited, diagnoses recorded (ICD-10 codes) during the visit, source of referral, and waiting time between referral and visit. However, information on medications received or prescribed in secondary care settings was not available. HES data were updated monthly within NHS Digital.
- **NHS Business Service Authority (BSA):** This dataset contains information on all medications dispensed by community pharmacies, including the actual cost paid for the dispensed medicine(s). Community dispensing data are updated monthly, with a lag of 7 to eleven weeks relative to receipt of information from the pharmacies.
- **Civil Registration (deaths):** Death data are maintained by NHS Digital and are updated weekly, with relevant information obtained from the Office of National Statistics (ONS), including date, place, and certificated cause(s) of death.
- **Personal Demographics Service (PDS):** This is the master demographics database for the NHS in England, Wales, and the Isle of Man. It is the primary source of information for patients' NHS number, name, address, and date of birth. It does not hold any clinical information. The master database contains approximately 74 million patient records. Records are created for newborns or when a new patient makes contact with an NHS service, primarily by registering with a GP practice, but also through accessing A&E services or hospital visits. NHS Digital used this dataset to identify patients who were alive as of 1 January 2022 and prepare the data extract. The PDS dataset was used solely for patient selection by NHS Digital.

## Supplement 2. Comorbidities identified in the study population

| Clinical characteristics                                     | Codes or descriptions                                                                                                                                                |
|--------------------------------------------------------------|----------------------------------------------------------------------------------------------------------------------------------------------------------------------|
| <b>Key immunocompromised groups</b>                          |                                                                                                                                                                      |
| Primary immunodeficiency                                     | ICD-10 codes: D80.x, D81.x, D82.x, D83.x, D84.x, D89.x, D71; and SNOMED codes                                                                                        |
| Secondary immunodeficiency                                   | OPCS codes: X89.1 – X89.5, X89.8, X89.9; and Dictionary of medicines and devices (dm+d) codes for immunosuppressive medications                                      |
| High-dose, long-term moderate dose corticosteroids treatment | dm+d codes for corticosteroids                                                                                                                                       |
| End-stage kidney disease or dialysis                         | ICD-10 codes: N18.5, Z99.2, Y84.1, Z49.1, Z49.2; OPCS codes: X40.x; and SNOMED codes                                                                                 |
| Organ transplants in the last five years                     | ICD-10 codes: Z94.0, Z94.1, Z94.2, Z94.3, Z94.4, Z94.5, Z94.6, Z94.9, T86.x and OPC and SNOMED codes                                                                 |
| Stem cell transplants                                        | ICD-10 code: T86.0; OPC codes: X33.6, W34.x, W99.x, X33.4, X33.5; and SNOMED codes                                                                                   |
| Solid tumours in the last five years                         | ICD-10 codes: C00 – C26, C30-C34, C37-C41, C43, C45-C80; SNOMED codes                                                                                                |
| Haematological malignancies in the last five years           | ICD-10 codes: C81-C86; C88, C90-C97, D45; and SNOMED codes                                                                                                           |
| HIV/AIDS                                                     | ICD-10 codes: B20.x, B21.x, B22.x, B23.x, B24.x; and SNOMED codes                                                                                                    |
| <b>Non-immunocompromised-related comorbidities</b>           |                                                                                                                                                                      |
| Diabetes                                                     | ICD-10 codes: E10.x, E11.x; and SNOMED codes                                                                                                                         |
| Current or former smoker                                     | SNOMED codes                                                                                                                                                         |
| Down's syndrome                                              | ICD-10 codes: Q90.x, H19.8; and SNOMED codes                                                                                                                         |
| Sickle cell disease                                          | ICD-10 codes: D57.x; and SNOMED codes                                                                                                                                |
| Thalassemia                                                  | ICD-10 codes: D56.x, D57.2; and SNOMED codes                                                                                                                         |
| Multiple sclerosis                                           | ICD-10 codes: G35.x; and SNOMED codes                                                                                                                                |
| Motor neuron disease                                         | ICD-10 codes: G12.2.; and SNOMED codes                                                                                                                               |
| Myasthenia gravis                                            | ICD-10 codes: G70.0.; and SNOMED codes                                                                                                                               |
| Huntington's disease                                         | ICD-10 codes: G710.x, F02.2; and SNOMED codes                                                                                                                        |
| Chronic heart disease                                        | ICD-10 codes: I11.0, I13.0, I13.2, I21.x, I22.x, I23.x, I26.x, I42.x, I50.x, I63.x, I70.x, I71.x, I72.x, I73.x, I74.x, I77.x, I80.x, I81.x, I82.x ; and SNOMED codes |
| Cerebrovascular disease                                      | ICD-10 codes: G45.x, G46.x, I60.x-I69.x; and SNOMED codes                                                                                                            |
| Chronic liver disease                                        | ICD-10 codes: B18.x, K70.1-K70.3, K71.0, K71.3, K71.4, K71.5, K71.7, K72.1, K73.x, K74.x, K76.0, K76.1, K76.6, K76.7, Q44.6; and SNOMED codes                        |
| Chronic lung disease                                         | ICD-10 codes: J40.x-J47.x, J60.x-J67.x, J68.4, J70.1, J70.3, J84.1, J92.0, J96.1, J98.2, J98.3; and SNOMED codes                                                     |
| Pulmonary hypertension                                       | ICD-10 codes: I27.0, I27.2; and SNOMED codes                                                                                                                         |
| Cystic fibrosis                                              | ICD-10 codes: E84.x, P75; and SNOMED codes                                                                                                                           |

Codes were identified in GPPR and HES APC

### Supplement 3. Immunosuppression or immunodeficiency definitions

| Broadly defined immunocompromised individuals                                                                                                                                                                                                                                                                                                                                                                                                                                                                                                                                                                                                                  | Stringently defined immunocompromised individuals                                                                                                                                                                                                                                                                                                                                     |
|----------------------------------------------------------------------------------------------------------------------------------------------------------------------------------------------------------------------------------------------------------------------------------------------------------------------------------------------------------------------------------------------------------------------------------------------------------------------------------------------------------------------------------------------------------------------------------------------------------------------------------------------------------------|---------------------------------------------------------------------------------------------------------------------------------------------------------------------------------------------------------------------------------------------------------------------------------------------------------------------------------------------------------------------------------------|
| Individuals with primary immunodeficiency                                                                                                                                                                                                                                                                                                                                                                                                                                                                                                                                                                                                                      | Individuals with moderate or severe primary immunodeficiency (i.e., common variable immunodeficiency disease, severe combined immunodeficiency, DiGeorge syndrome, Wiskott-Aldrich syndrome)                                                                                                                                                                                          |
| Individuals receiving immunosuppressive therapy[ies]                                                                                                                                                                                                                                                                                                                                                                                                                                                                                                                                                                                                           | Individuals with active treatment with alkylating agents, antimetabolites, transplant-related immunosuppressive drugs, cancer chemotherapeutic agents classified as severely immunosuppressive, TNF blockers, and other biologic agents that are immunosuppressive or immunomodulatory (e.g., B-cell depleting agents)                                                                |
| Individuals who have received a solid-organ or islet transplant, not including corneal transplants                                                                                                                                                                                                                                                                                                                                                                                                                                                                                                                                                             | Organ Transplant: Individuals who have received 1) a recent solid-organ transplant (not including corneal transplants) or islet transplant; or 2) a solid-organ transplant or islet transplant at any time and were also receiving immunosuppressive treatment; or 3) a solid-organ transplant or islet transplant at any time and with evidence of chronic graft versus host disease |
| Individuals who have received a stem cell transplant in the last 2 years                                                                                                                                                                                                                                                                                                                                                                                                                                                                                                                                                                                       | Individuals who have received a recent or haematopoietic stem cell transplant within the 2 years prior to 1 September 2020; or a haematopoietic stem cell transplant within 2 years and receiving immunosuppressive treatment; or 3) a haematopoietic stem cell transplant within 2 years with evidence of chronic graft versus host disease                                          |
| Individuals with end-stage kidney disease                                                                                                                                                                                                                                                                                                                                                                                                                                                                                                                                                                                                                      | None                                                                                                                                                                                                                                                                                                                                                                                  |
| Individuals with evidence of solid tumour[s] in the <u>5-year baseline period</u> classified into the following mutually exclusive groups based on the timing of cancer treatment: 0-6m; 6-12m; >12m                                                                                                                                                                                                                                                                                                                                                                                                                                                           | Individuals with evidence of solid tumour[s] in the <u>5-year baseline period</u> with active treatment in the 6 months prior to 1 January 2022                                                                                                                                                                                                                                       |
| Individuals with evidence of haematological malignancy[ies] in the <u>5-year baseline period</u> classified into the following mutually exclusive groups based on the timing of cancer treatment: 0-6m; 6-12m; >12m                                                                                                                                                                                                                                                                                                                                                                                                                                            | Individuals with evidence of haematological malignancy[ies] associated with poor responses to COVID-19 vaccines regardless of current treatment status (i.e., chronic lymphocytic leukaemia, non-Hodgkin's lymphoma, multiple myeloma, acute leukaemia)                                                                                                                               |
| <ul style="list-style-type: none"> <li>Individuals who received high-dose corticosteroids (equivalent to <math>\geq 20</math> mg prednisolone per day) for more than 10 days in the month prior to 1 September 2020</li> <li>Individuals with chronic immune-mediated inflammatory disease and had received long-term moderate dose corticosteroids (equivalent to 10 mg prednisolone per day for more than 4 weeks) in the 3 months prior to 1 September 2020</li> <li>Individuals with high-dose steroids (equivalent to <math>&gt;40</math> mg prednisolone per day for more than a week) for any reason in the month prior to 1 September 2020.</li> </ul> | Individuals on active treatment with high-dose corticosteroids steroids (i.e., $\geq 20$ mg prednisone or equivalent per day when administered for $\geq 2$ weeks)                                                                                                                                                                                                                    |
|                                                                                                                                                                                                                                                                                                                                                                                                                                                                                                                                                                                                                                                                | Individuals with advanced or untreated HIV infection (people with HIV and CD4 cell counts $<200/\text{mm}^3$ , history of an AIDS-defining illness without immune reconstitution, or clinical manifestations of symptomatic HIV)                                                                                                                                                      |

AIDS – Acquired immunodeficiency syndrome, HIV – human immunodeficiency virus, m – month(s), TNF – tumour necrosis factor

**Supplement 4. Estimated number of COVID-19 events by immunocompromised condition, England, 2022.**

|                                                                                                             | Overall population |                           |                         |                         | Vaccinated population |                           |                         |                         |
|-------------------------------------------------------------------------------------------------------------|--------------------|---------------------------|-------------------------|-------------------------|-----------------------|---------------------------|-------------------------|-------------------------|
|                                                                                                             | Total population   | COVID-19 hospitalisations | COVID-19 ICU admissions | COVID-19-related deaths | Total population      | COVID-19 hospitalisations | COVID-19 ICU admissions | COVID-19-related deaths |
| <b>Overall study population (aged 12+ years)</b>                                                            | 47962920           | 83640                     | 1760                    | 19240                   | 24242540              | 58400                     | 1020                    | 13700                   |
| <b>Total broadly defined immunocompromised</b>                                                              | 1883640            | 18340                     | 500                     | 4580                    | 1591340               | 14500                     | 360                     | 3420                    |
| <b>Total stringently defined immunocompromised</b>                                                          | 332740             | 6700                      | 300                     | 1420                    | 278240                | 5340                      | 220                     | 1180                    |
| Primary immunodeficiency                                                                                    | 37280              | 780                       | <40                     | 180                     | 26420                 | 620                       | <40                     | 140                     |
| Moderate to severe primary immunodeficiency†                                                                | 5080               | 120                       | 0                       | <40                     | 3480                  | 80                        | 0                       | <40                     |
| Secondary immunodeficiency                                                                                  | 359540             | 3380                      | 100                     | 780                     | 301860                | 2740                      | 80                      | 520                     |
| Active treatment with non-corticosteroid immunosuppressive or immunomodulatory therapy†                     | 45460              | 1020                      | 60                      | 240                     | 37480                 | 800                       | 40                      | 180                     |
| High-dose, long-term moderate dose corticosteroids                                                          | 16520              | 160                       | 0                       | <40                     | 14040                 | 140                       | 0                       | <40                     |
| High-dose corticosteroids†                                                                                  | 13460              | 80                        | 0                       | <40                     | 11080                 | 80                        | 0                       | <40                     |
| End-stage kidney disease                                                                                    | 93260              | 2360                      | 140                     | 580                     | 72220                 | 1720                      | 100                     | 400                     |
| Solid organ transplant in last five years                                                                   | 29500              | 860                       | 60                      | 140                     | 23060                 | 680                       | 40                      | 120                     |
| ≤ 1 year prior†                                                                                             | 10820              | 300                       | <40                     | 40                      | 8260                  | 220                       | <40                     | 40                      |
| >1 year and ≤ 2 years prior†                                                                                | 6160               | 180                       | <40                     | 40                      | 4800                  | 140                       | 0                       | <40                     |
| On anti-rejection therapies†                                                                                | 10560              | 340                       | <40                     | 40                      | 8300                  | 240                       | <40                     | 40                      |
| Stem cell transplant in last two years†                                                                     | 5740               | 140                       | <40                     | <40                     | 3980                  | 80                        | 100                     | <40                     |
| Solid tumours in last five years                                                                            | 1237580            | 9660                      | 140                     | 2500                    | 1063840               | 7660                      | <40                     | 1860                    |
| With active treatment (≤6 months prior)†                                                                    | 110800             | 1720                      | <40                     | 240                     | 93900                 | 1340                      | <40                     | 200                     |
| With recent treatment (>6-12 months prior)                                                                  | 27940              | 300                       | <40                     | 40                      | 23840                 | 200                       | <40                     | <40                     |
| With distant treatment (>12 months prior)                                                                   | 145920             | 820                       | <40                     | 240                     | 125220                | 680                       | 160                     | 160                     |
| Haematological malignancy in last five years                                                                | 241080             | 4580                      | 220                     | 1200                    | 202660                | 3700                      | 80                      | 1000                    |
| With active treatment (≤6 months prior)†                                                                    | 33680              | 1680                      | 100                     | 360                     | 27840                 | 1300                      | <40                     | 300                     |
| With recent treatment (>6-12 months prior)                                                                  | 9000               | 280                       | <40                     | 40                      | 7500                  | 200                       | <40                     | 40                      |
| With distant treatment (>12 months prior)                                                                   | 47960              | 660                       | <40                     | 180                     | 40660                 | 560                       | 160                     | 160                     |
| Chronic lymphocytic leukaemia, non-Hodgkin's lymphoma, multiple myeloma, acute leukaemia (≤ 2 years prior)† | 142880             | 3700                      | 200                     | 940                     | 121180                | 3020                      | 0                       | 800                     |
| Advanced or untreated HIV†                                                                                  | 2320               | <40                       | 0                       | <40                     | 1820                  | <40                       | 100                     | <40                     |

†Stringent immunocompromised subgroups, HIV – human immunodeficiency virus.

Since the study sample consists of a random sample of 25% of patients in NHS, approximate numbers for the total England population were obtained by multiplying the numbers in the study sample by 4.

## Supplement 5. The incidence rate ratio of COVID-19 hospitalisation, ICU admission and mortality in immunocompromised groups compared to the total study population.

Adjusted Incidence Rate Ratio and 95% Confidence Intervals of COVID-19 hospitalisations, ICU admissions and mortality in England, 2022.

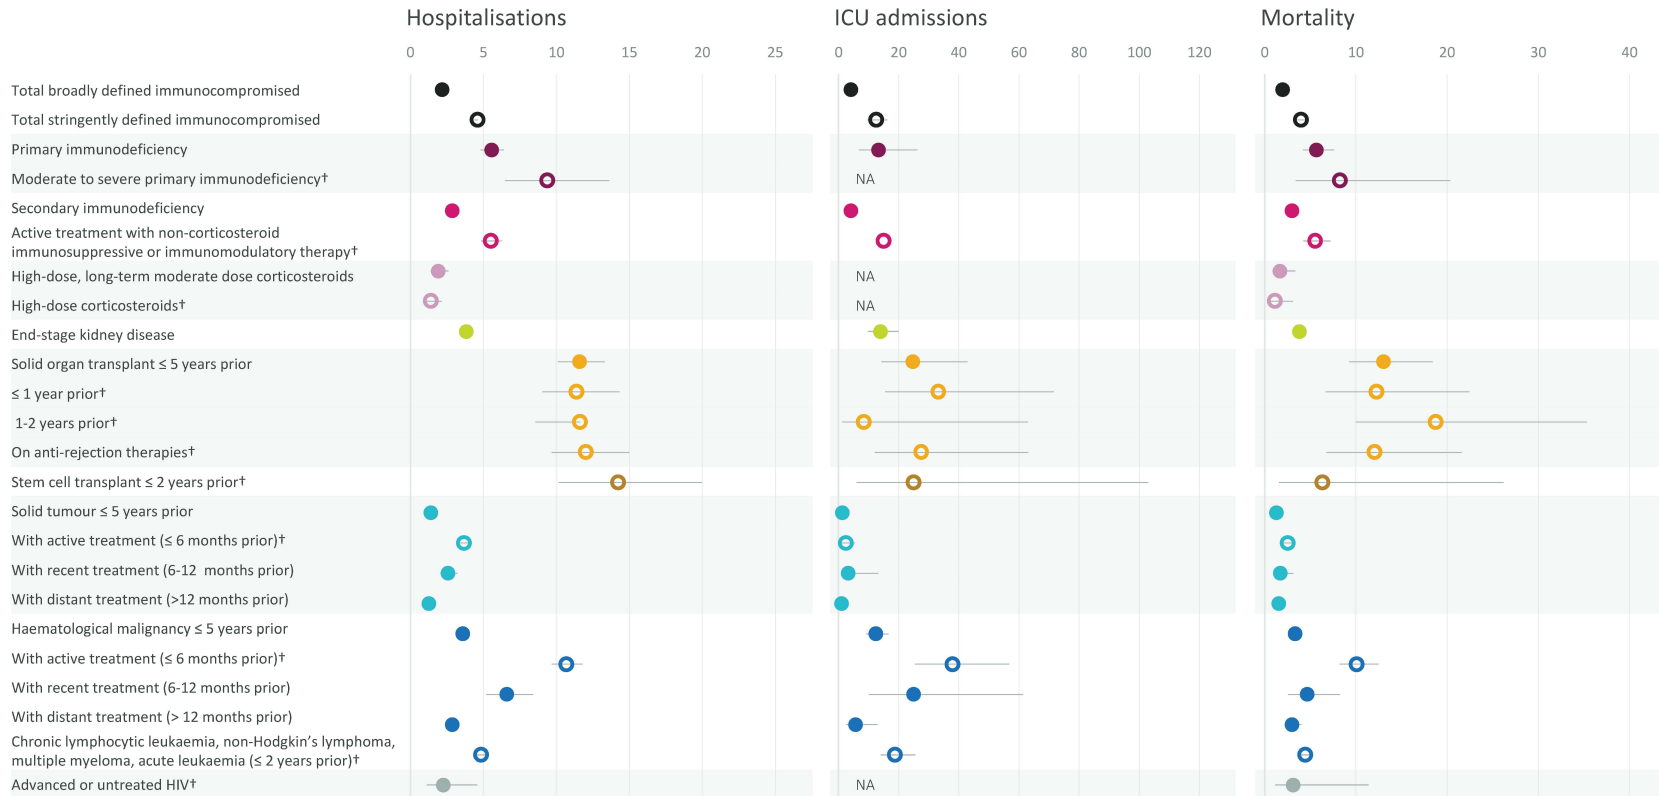

† Stringently-defined immunocompromised groups, HIV – human immunodeficiency virus, ICU – intensive care unit

**Supplement 6. The incidence risk ratio of COVID-19 hospitalisation, ICU admission and mortality in fully vaccinated immunocompromised groups compared to the total study population.**

**Adjusted Incidence Rate Ratio and 95% Confidence Intervals of COVID-19 hospitalisations, ICU admissions and mortality in the vaccinated population (≥3 vaccine doses), England, 2022.**

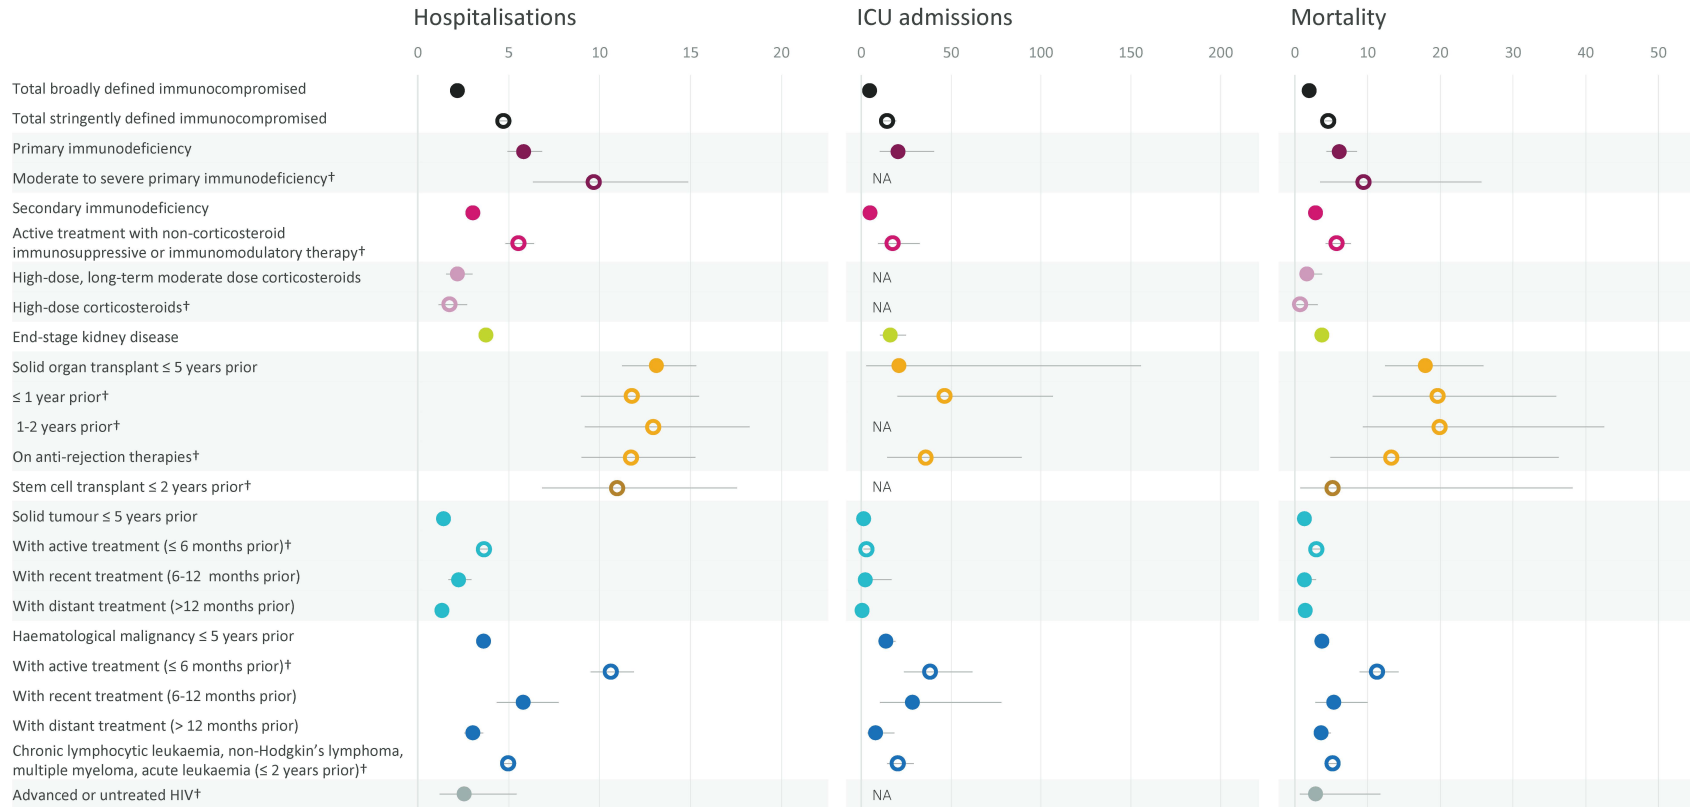

† Stringently-defined immunocompromised groups, HIV – human immunodeficiency virus, ICU – intensive care unit

## Supplement 7. Total number COVID-19 hospitalisations occurring among fully vaccinated immunocompromised groups in 2022 by number of COVID-19 hospitalisations per 1000 population and total population size in England.

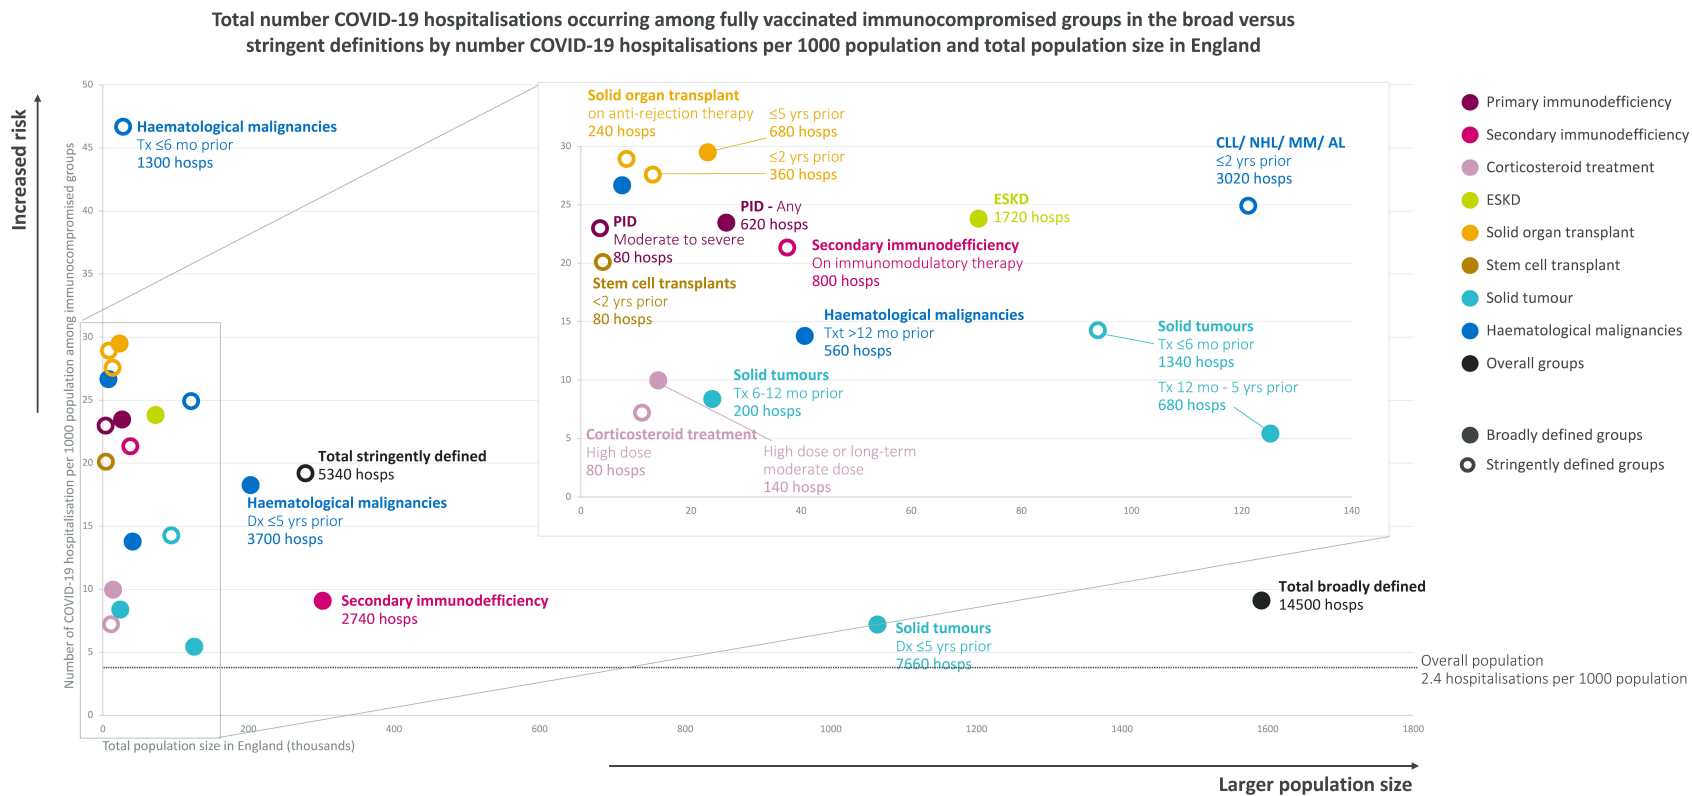

AL – acute leukaemia, CLL – chronic lymphocytic leukaemia, Dx – diagnosis, ESKD – end-stage kidney disease, hosps – hospitalisations, MM – multiple myeloma, mo – months, NHL – non-Hodgkin’s lymphoma, PID – primary immunodeficiency, Tx – treatment, yrs – years
